# Supplementary material for: Design of a multi-functional gel polymer electrolyte with a 3D compact stacked polymer micro-sphere matrix for high-performance lithium metal batteries
Source: Royal Society of Chemistry journal article supplement (doi:10.1039/d2ta02085h), 2022-01-01
Supplement: d2ta02085h1.pdf [file d2ta02085h1.pdf]

# Supplementary Information

## Design of multi-functional gel polymer electrolyte with 3D compact stacked polymer micro-sphere matrix for high- performance lithium metal batteries

Jiyuan Liang<sup>a\*‡</sup>, Runming Tao<sup>bc‡</sup>, Ji Tu<sup>a‡</sup>, Chi Guo<sup>a</sup>, Kang Du<sup>a</sup>, Rui Guo<sup>a</sup>, Wang  
Zhang<sup>a</sup>, Xiaolang Liu<sup>a</sup>, Pingmei Guo<sup>a</sup>, Deyu Wang<sup>a</sup>, Sheng Dai<sup>bc\*</sup>, Xiao-Guang Sun<sup>c\*</sup>

a. Key Laboratory of Optoelectronic Chemical Materials and Devices of Ministry of Education,  
School of Optoelectronic Materials & Technology, Jiangnan University, Wuhan 430056, China

b. Department of Chemistry, University of Tennessee, Knoxville, TN 37996

c. Chemical Sciences Division, Oak Ridge National Laboratory, Oak Ridge, TN 37831, USA

‡ These authors contributed equally to this work.

### Corresponding authors:

E-mail: liangjy2004@126.com (Dr. J. Liang);

[dais@ornl.gov](mailto:dais@ornl.gov) (Dr. S. Dai);

[sunx@ornl.gov](mailto:sunx@ornl.gov) (Dr. X-G. S).

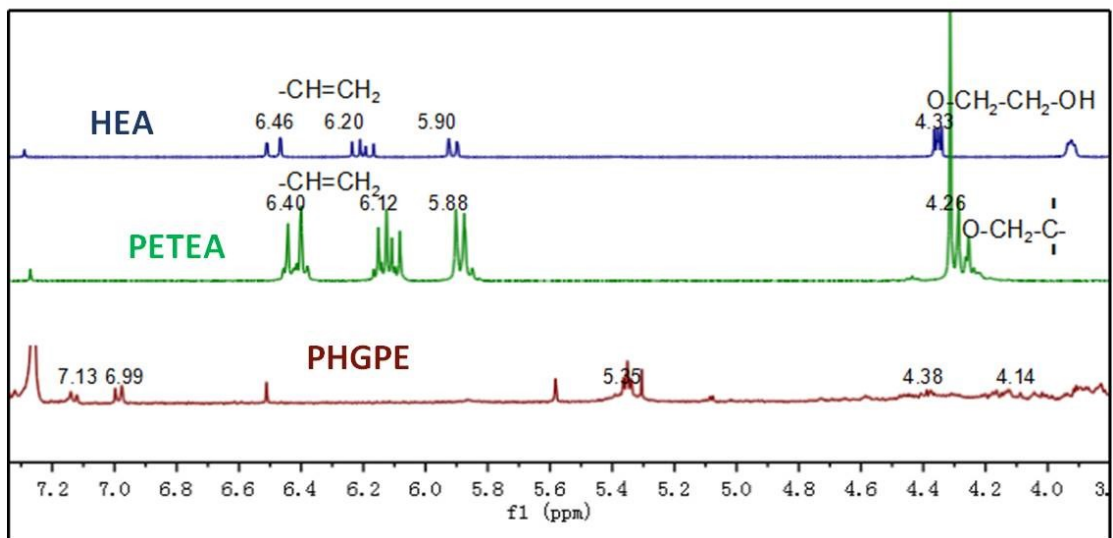

**Fig. S1.** <sup>1</sup>H NMR spectra of HEA, PETEA and PHGPE

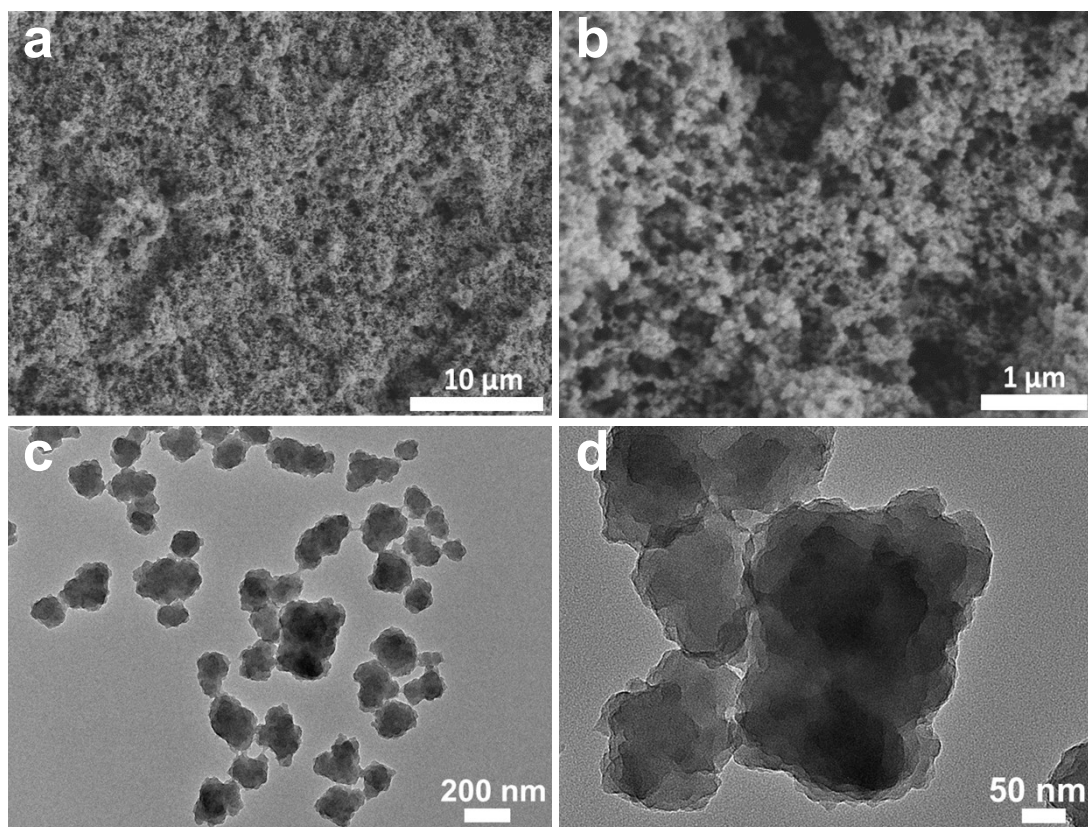

**Fig. S2.** (a, b) SEM images of PGPE matrix. (c, d) TEM images of PGPE matrix.

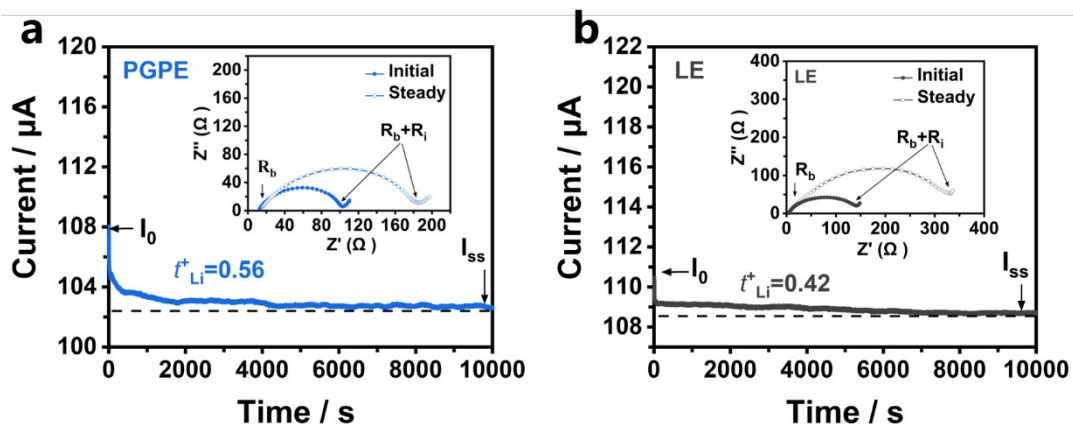

**Fig. S3.** The chronoamperometry profiles of (a) Li||PGPE||Li and (b) Li||LE||Li cells under a polarization voltage of 10 mV. The corresponding EISs before and after polarization are shown in the insets.

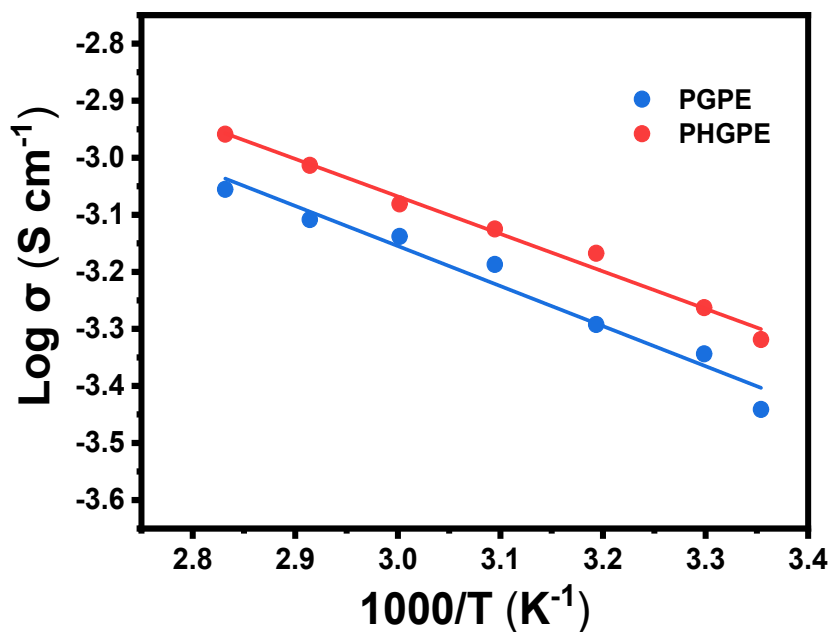

**Fig. S4.** Ionic conductivities of PGPE and PHGPE as a function of temperature.

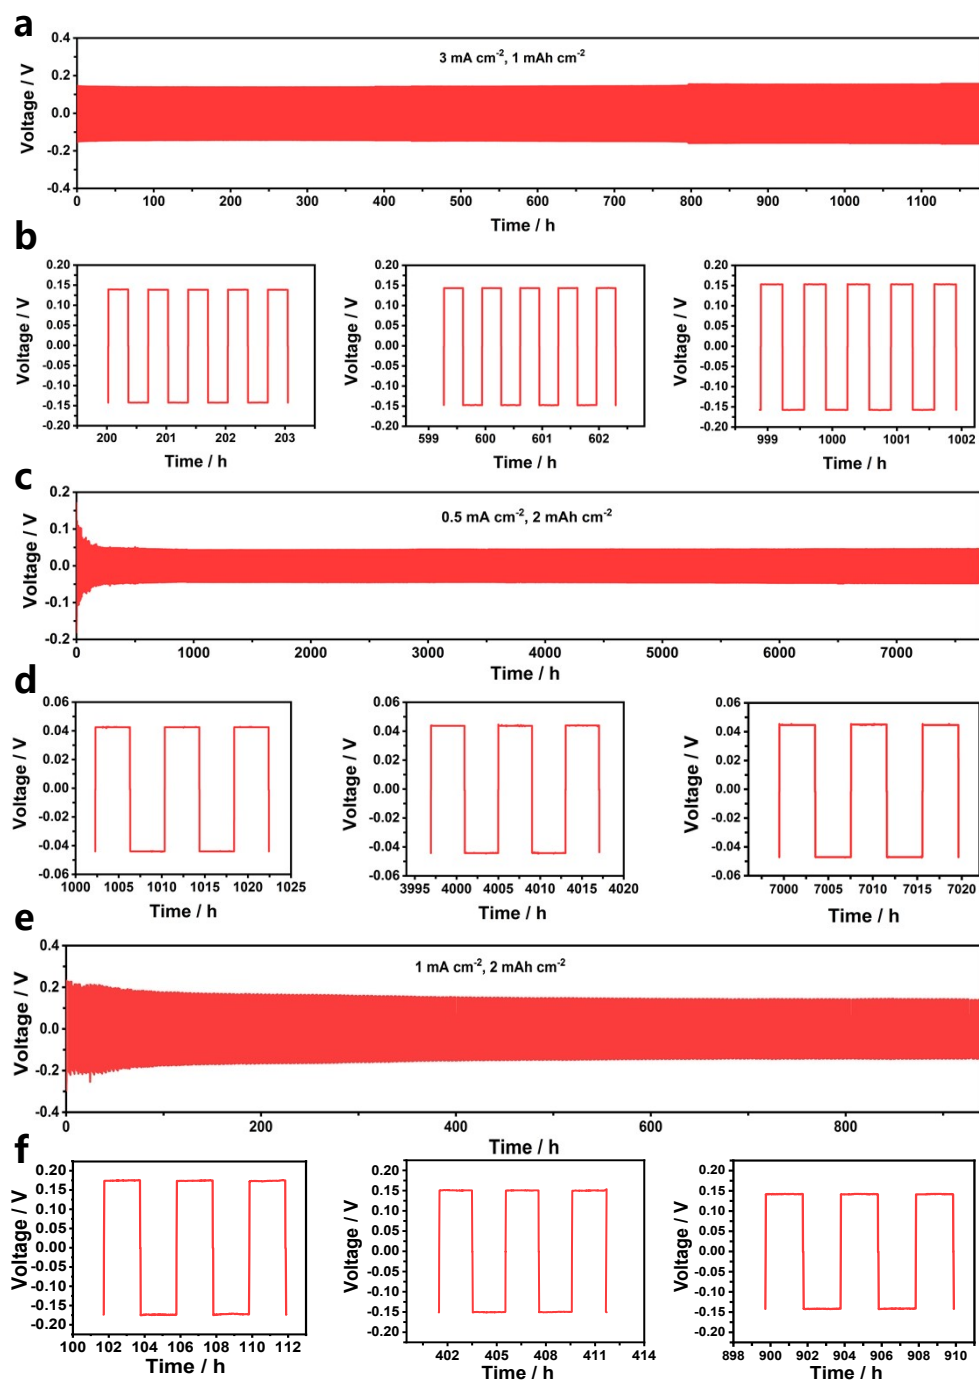

**Fig. S5.** Cycling performance of Li||PHGPE||Li symmetric cells at (a-b)  $3 \text{ mA cm}^{-2}$ ,  $1 \text{ mAh cm}^{-2}$ , (c-d)  $0.5 \text{ mA cm}^{-2}$ ,  $2 \text{ mAh cm}^{-2}$ , (e-f)  $1 \text{ mA cm}^{-2}$ ,  $2 \text{ mAh cm}^{-2}$ .

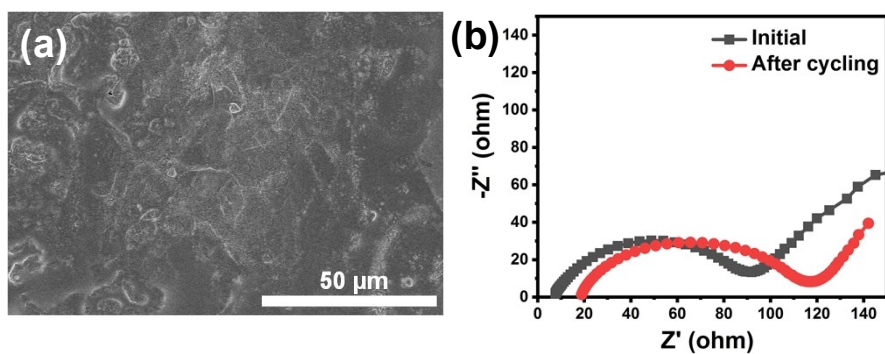

**Fig. S6.** (a) SEM image of Lithium metal in PHGPE based symmetric cell after 960 h cycling with a cycling capacity of  $2 \text{ mAh cm}^{-2}$  at a current rate of  $1 \text{ mA cm}^{-2}$ : (b) Nyquist plots of Li||PHGPE||Li symmetric cell before and after cycling.

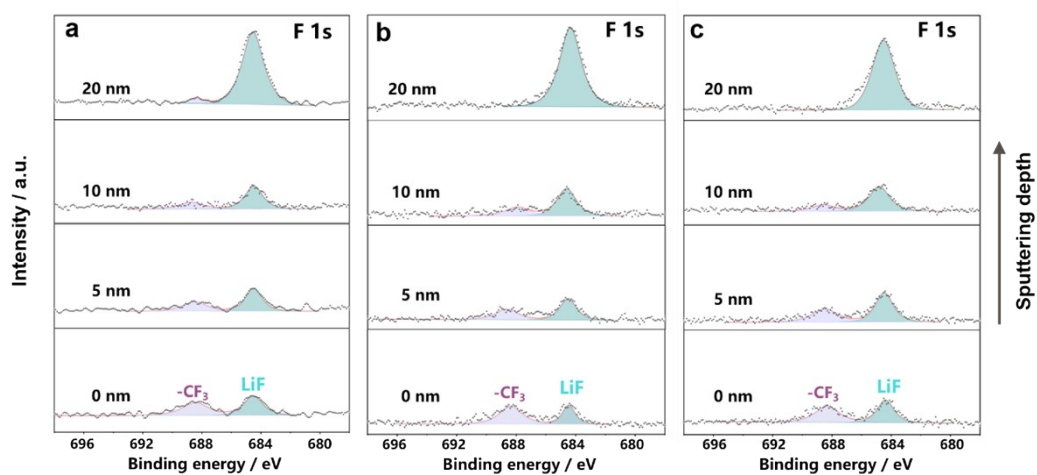

**Fig. S7.** F-1s HRXPS spectra of (a) LE, (b) PGPE and (c) PHGPE at different sputtering depths after 10 cycles of symmetric Li-ion battery. C-F: 688.7 eV, LiF: 684.5 eV.

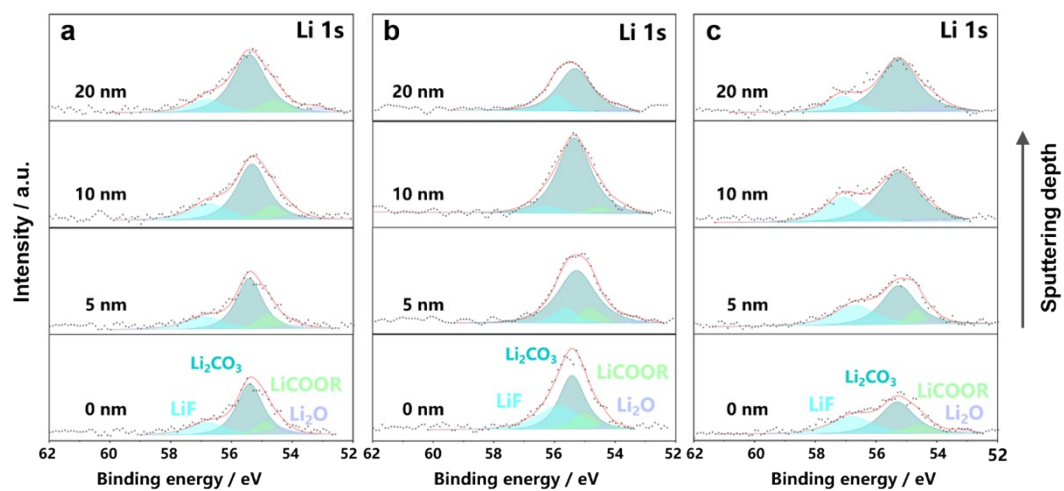

**Fig. S8.** Li-1s HRXPS spectra of (a) LE, (b) PGPE, (c) PHGPE at different sputtering depths after 10 cycles of symmetric Li-ion battery. LiF: 56.88 eV, Li<sub>2</sub>CO<sub>3</sub>: 55.38 eV, LiCOOR: 54.88 eV, Li<sub>2</sub>O: 54.28 eV.

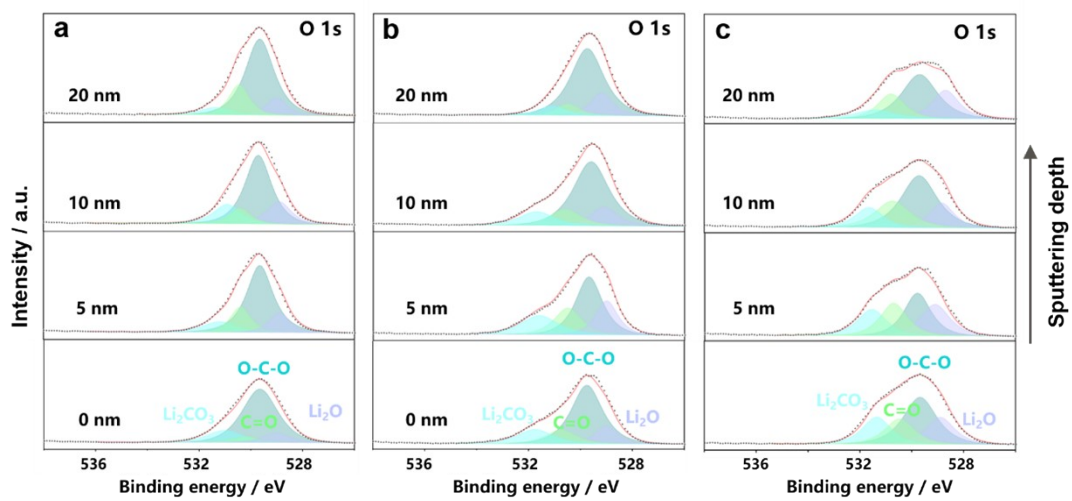

**Fig. S9.** O-1s HRXPS spectra of (a) LE, (b) PGPE, (c) PHGPE at different sputtering depths after 10 cycles of symmetric Li-ion battery.



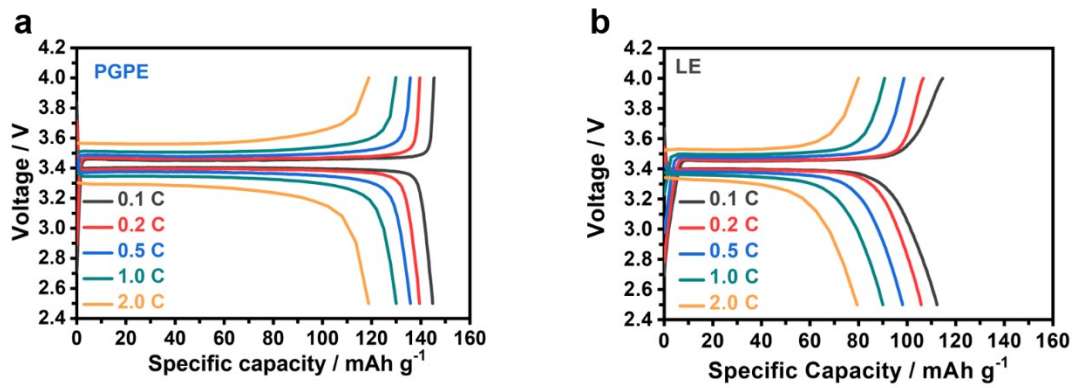

**Fig. S10.** Capacity voltage distribution of Li||electrolyte||LFP at different multipliers, (a) PGPE; (b) LE.

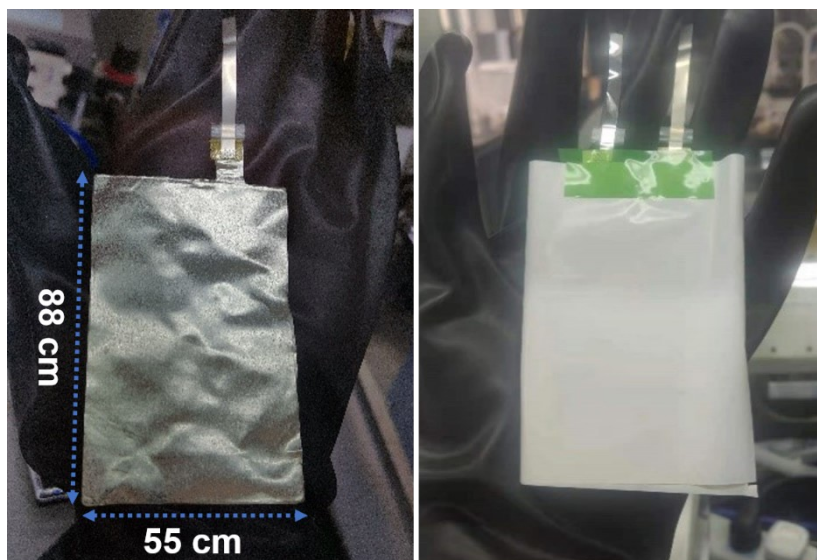

**Fig. S11.** Digital images of Li foil for nickel tabs

**Table S1.** The comparison of Li||Li symmetrical cell cycling performances between this work and other reported literatures.

| Electrolyte                                | Current density / areal capacity (mA cm <sup>-2</sup> / mAh cm <sup>-2</sup> ) | Plating/ stripping (hours) | Ref.      |
|--------------------------------------------|--------------------------------------------------------------------------------|----------------------------|-----------|
| SPE1-PI-ZIF8                               | 0.1/0.1                                                                        | 800 h                      | 1         |
|                                            | 0.3/0.3                                                                        | 300 h                      |           |
| Li/CF composites                           | 0.25/0.5                                                                       | 750 h                      | 2         |
|                                            | 0.5/0.5                                                                        | 560 h                      |           |
| PEO-SCN-LiTFSI                             | 0.05/0.05                                                                      | 600 h                      | 3         |
| Al <sub>2</sub> O <sub>3</sub> -GPE        | 1/1                                                                            | 1000 h                     | 4         |
| CSE-B- 71515                               | 0.2/0.2                                                                        | 333 h                      | 5         |
| PDADMA-FSI                                 | 0.1/0.1                                                                        | 225 h                      | 6         |
| IPN9-10PPC                                 | 1.5/1.5                                                                        | 300 h                      | 7         |
| PIL-IPN                                    | 0.5/1.5                                                                        | 1800 h                     | 8         |
| POSS-4PEG2K                                | 0.3/0.9                                                                        | 2600 h                     | 9         |
| GPR <sub>5</sub> -LiTFSI                   | 0.1/0.1                                                                        | 600 h                      | 10        |
| PVDF film                                  | 0.5/0.5                                                                        | 1400 h                     | 11        |
|                                            | 1/1                                                                            | 650 h                      |           |
|                                            | 1/2                                                                            | 370 h                      |           |
| Li <sub>3</sub> PO <sub>4</sub> /PVA layer | 1/2                                                                            | 1000 h                     | 12        |
| PU-LiF                                     | 1/1                                                                            | 1000 h                     | 13        |
|                                            | 1/2                                                                            | 800 h                      |           |
| PHGPE                                      | 1/1                                                                            | 6000 h                     | This work |
|                                            | 0.5/2                                                                          | 7700 h                     |           |
|                                            | 1/2                                                                            | 7700 h                     |           |

**Table S2.** The specifications of the Li||LFP pouch cell.

| Cell components      | Specification                                                                                 | Parameters     |
|----------------------|-----------------------------------------------------------------------------------------------|----------------|
| Cathode (LFP)        | Areal mass loading ( $\text{mg cm}^{-2}$ )                                                    | 11.71          |
|                      | The area of cathode ( $\text{mm} \times \text{mm}$ )                                          | $50 \times 83$ |
|                      | The content of LFP (wt.%)                                                                     | 96             |
|                      | Folds                                                                                         | 12             |
| Anode (Lithium foil) | Thickness ( $\mu\text{m}$ )                                                                   | 60             |
|                      | The area of lithium foil ( $\text{mm}^2$ )                                                    | $55 \times 88$ |
|                      | Folds                                                                                         | 13             |
| Electrolyte          | 1.0 M $\text{LiPF}_6$ in EC : DMC=1 : 1 V/V<br>(contain 1.5% of the mass fraction with PHGPE) |                |
|                      | The mass of electrolyte (g): capacity of pouch cell (Ah)                                      | 2:1            |
| Pouch cell           | Specific capacity (Ah)                                                                        | 1              |

## Reference:

- [1] Wang G, He P, Fan L. Asymmetric Polymer Electrolyte Constructed by Metal-Organic Framework for Solid-State, Dendrite-Free Lithium Metal Battery[J]. *Advanced Functional Materials*, 2020, 31(3): 2007198.
- [2] Zhang Y, Shi Y, Gu Y, et al. A 3D Lithium/Carbon Fiber Anode with Sustained Electrolyte Contact for Solid-State Batteries[J]. *Advanced Energy Materials*, 2020, 10(3): 1903325.
- [3] He Y, Chen S, Nie L, et al. Stereolithography 3D Printing Solid Polymer Electrolytes for All-Solid-State Lithium-Metal Batteries[J]. *Nano Letters*, 2020, 20(10): 7136-7143.
- [4] Wang S, Zhou L, Yang W, et al. In-Situ synthesized Non-flammable gel polymer electrolyte enable highly safe and Dendrite-Free lithium metal batteries[J]. *Chemical Engineering Journal*, 2021(4):128846.
- [5] Yang L, Wang Z, Feng Y, et al. Flexible Composite Solid Electrolyte Facilitating Highly Stable "Soft Contacting" Li-Electrolyte Interface for Solid State Lithium-Ion Batteries[J]. *Advanced Energy Materials*, 2017, 7(22):1701437.
- [6] Wang X, Chen F, Girard G, et al. Poly(Ionic Liquid)s-in-Salt Electrolytes with Co-coordination-Assisted Lithium-Ion Transport for Safe Batteries[J]. *Joule*, 2019, 3(11):1-16.
- [7] Zheng Y, Li X, Li C. A novel de-coupling solid polymer electrolyte via semi-interpenetrating network for lithium metal battery[J]. *Energy Storage Materials*, 2020, 29:42-51.
- [8] Li X, Zheng Y, Pan Q, et al. Polymerized Ionic Liquid-Containing Interpenetrating Network Solid Polymer Electrolytes for All-Solid-State Lithium Metal Batteries[J]. *ACS Applied Materials Interfaces*, 2019, 11(38): 34904-34912.
- [9] Smith D, Pan Q, Wang S, et al. Hybrid Electrolytes with Controlled Network Structures for Lithium Metal Batteries[J]. *Advanced Materials*, 2015, 27(39):5995-6001.
- [10] Imholt L, Zhang P, Ibing Lukas, et al. Grafted polyrotaxanes as highly conductive electrolytes for lithium metal batteries[J]. *Journal of Power Sources*, 2019, 409: 148-158.

[11] Gao Z, Zhang S, Huang Z, et al. Protection of Li metal anode by surface-coating of PVDF thin film to enhance the cycling performance of Li batteries. *Chinese Chemical Letters*, 2019, 30(2): 525-528.

[12] Hao S, Ma Z, Zhao Y, et al. In Situ Li<sub>3</sub>PO<sub>4</sub>/PVA Solid Polymer Electrolyte Protective Layer Stabilizes the Lithium Metal Anode. *ACS omega*, 2020, 5(14):8299-8304.

[13] Liu Y, Tao R, Chen S, et al. A novel polyurethane-LiF artificial interface protective membrane as a promising solution towards high-performance lithium metal batteries[J]. *Journal of Power Sources*, 2020, 477: 228694.,
